# Supplementary material
Source: PubMed Central journal article supplement (PMC3048744)
Supplement: supp_M110.200816_jbc.M110.200816-1.pdf [file supp_M110.200816_jbc.M110.200816-1.pdf]

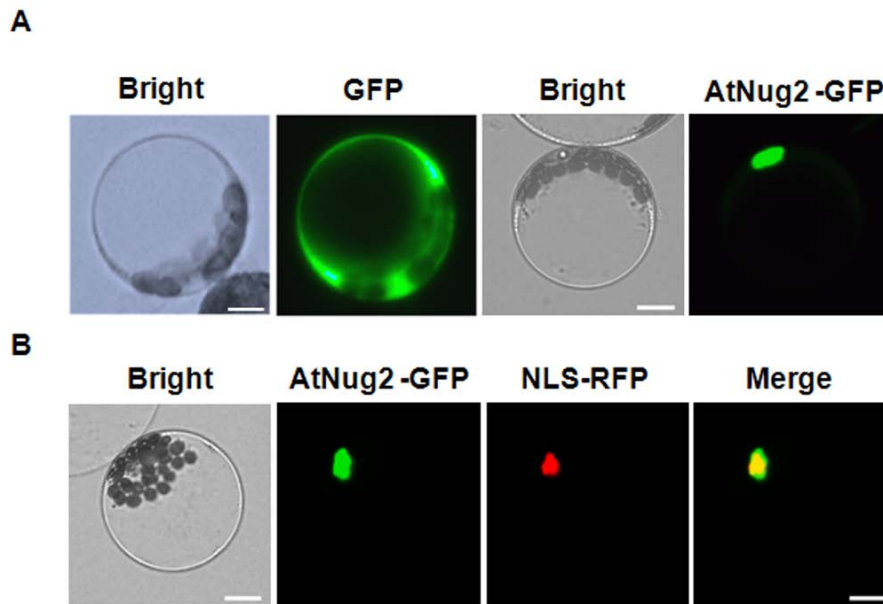

Supplemental Fig. S1. Subcellular localization of AtNug2. *A*. GFP or GFP-AtNug2 expression plasmids (15  $\mu$ g) were introduced into Arabidopsis protoplasts using the polyethylene glycol method. Cells were incubated for 48 hr and then cytoplasmic and nuclear signals were observed under a fluorescent microscope. *B*. Arabidopsis protoplasts were cotransformed with plasmids encoding GFP-AtNug2 (15  $\mu$ g) and NLS-RFP (15  $\mu$ g). Subcellular localizations were performed as in *A*. The white bar represents 10  $\mu$ m.
