# Supplementary material
Source: PubMed Central journal article supplement (PMC3048744)
Supplement: supp_M110.200816_jbc.M110.200816-2.pdf [file supp_M110.200816_jbc.M110.200816-2.pdf]

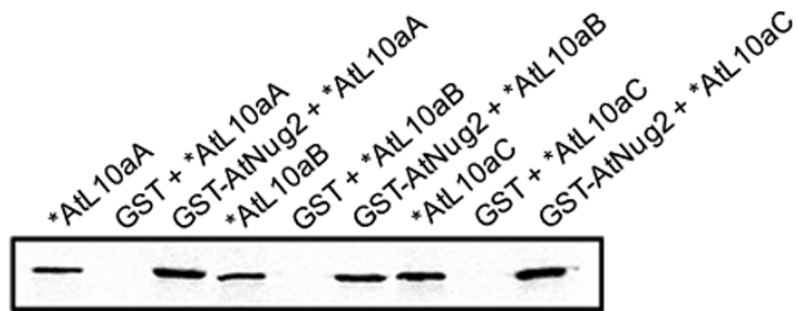

Supplemental Fig. S2. Physical interaction between AtNug2 and various AtL10a homologs. Pull-down assay of GST-AtNug2 with [<sup>35</sup>S]methionine-labeled AtL10aA, AtL10aB or AtL10aC. Radiolabeled AtL10a proteins were incubated with GST alone (lanes 2, 5 and 8) or GST-AtNug2 (lanes 3, 6 and 9). Reaction mixtures were incubated with glutathione beads, centrifuged and then the supernatant was discarded. Residual precipitates were boiled and subjected to SDS-PAGE. Five percent of total <sup>35</sup>S-labeled AtL10a was loaded onto lanes 1, 4 and 7, and 50% of each sample was used for pull-down assays (lanes 3, 6 and 9).
