# Supplementary material
Source: PubMed Central journal article supplement (PMC3048744)
Supplement: supp_M110.200816_jbc.M110.200816-3.pdf [file supp_M110.200816_jbc.M110.200816-3.pdf]

Supplemental Table S1 The putative GTPases of YawG subfamily in plant

| <sup>a</sup> ORF     | <sup>b</sup> Gene | <sup>c</sup> Gene index no. | <sup>d</sup> Identity | <sup>e</sup> Description                  |
|----------------------|-------------------|-----------------------------|-----------------------|-------------------------------------------|
| <i>S. cerevisiae</i> |                   | <i>O. sativa</i>            |                       |                                           |
| YER006W              | Nug1              | Os01g27730                  | 29%                   | Guanine nucleotide-binding protein-like 3 |
| YNR053C              | Nug2/Nog2p        | Os03g22890                  | 49%                   | Putative Nucle(ol)ar GTP binding protein  |
| YGL099W              | Lsg1              | Os12g42370                  | 41%                   | Putative GTP binding protein              |
|                      |                   | Os03g44530                  | 37%                   | Expressed protein                         |
|                      |                   | <i>A. thaliana</i>          |                       |                                           |
| YER006W              | Nug1              | At3g07050                   | 30%                   | GTP-binding family protein                |
| YNR053C              | Nug2/Nog2p        | At1g52980                   | 51%                   | GTP-binding family protein                |
| YGL099W              | Lsg1              | At2g27200                   | 41%                   | GTP-binding family protein                |
|                      |                   | At1g08410                   | 39%                   | GTP-binding family protein                |

<sup>a</sup> identify the genes with ORF names

<sup>b</sup> gene names of YawG subfamily in yeast

<sup>c</sup> index number of putative GTPases in plant

<sup>d</sup> amino acid sequence homology between yeast proteins and plant proteins
